# Supplementary material
Source: Research Square preprint supplement (doi:10.21203/rs.3.rs-9422165/v1)

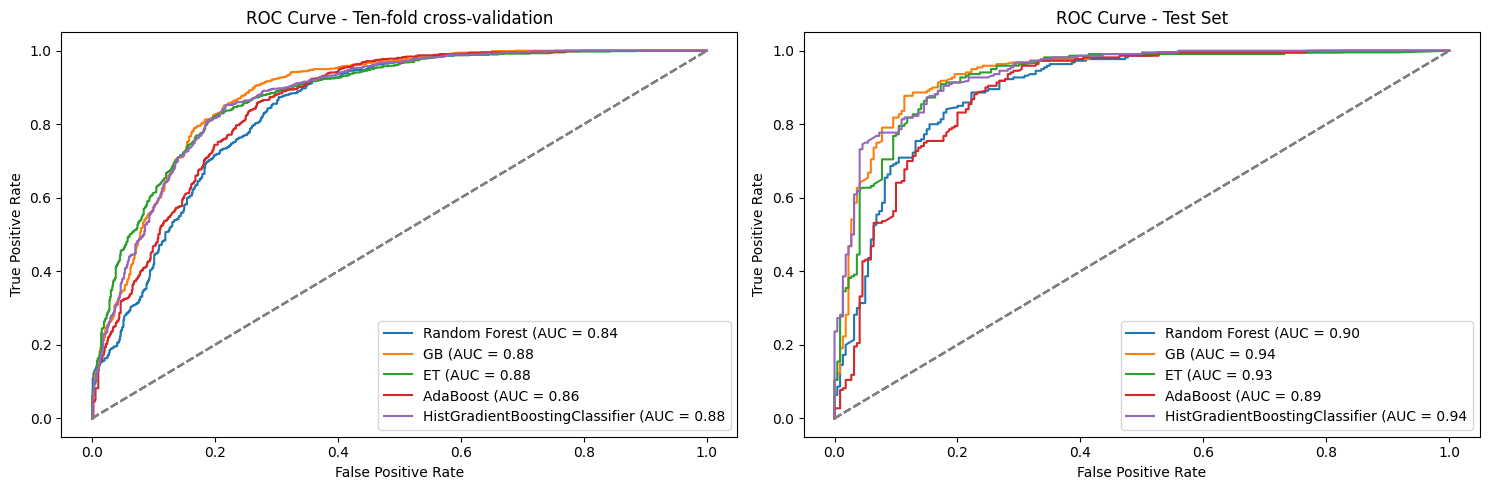
**Supplementary fig. 1.** ROC Curve Comparison of Five Machine Learning Algorithms on HER2 Small Molecules: Demonstrating Receiver Operating Characteristic (ROC) curves from 10-fold cross-validation and Test set

**Supplementary Table 1.** 2D structures of the selected top compounds after virtual screening against HER2 using molecular docking


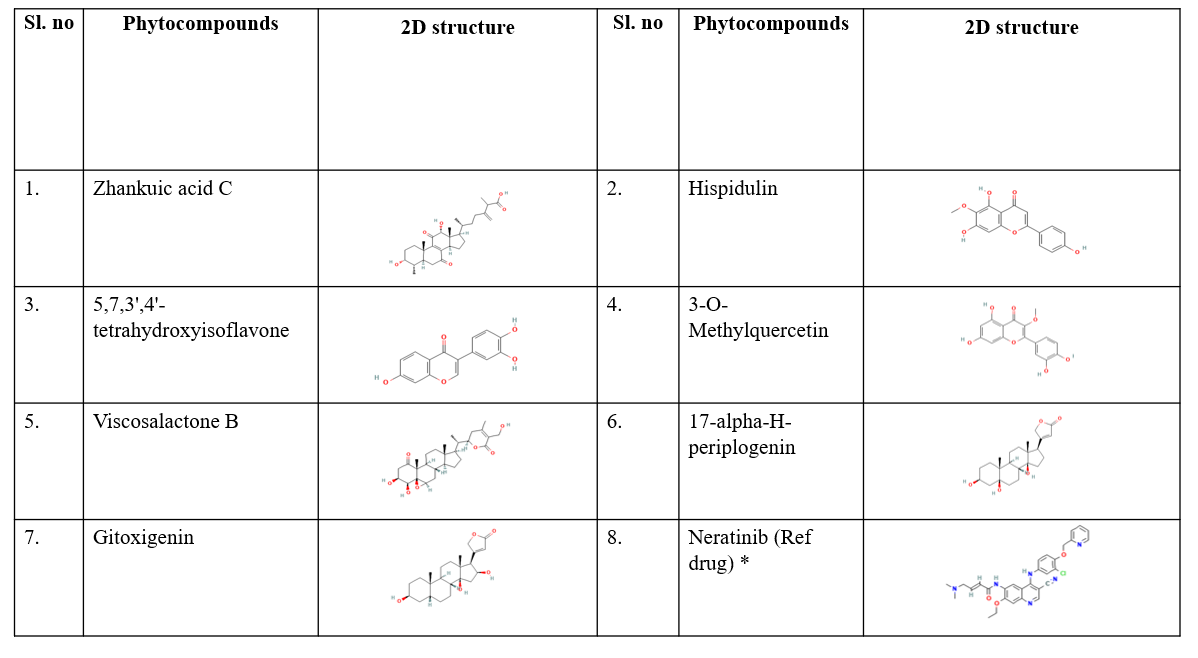

Supplement: Supplementary file 1 [file 9d9a5a713029bb9885dece8e.docx]
